# Supplementary material for: Chitosan sulfate inhibits angiogenesisviablocking the VEGF/VEGFR2 pathway and suppresses tumor growthin vivo
Source: Royal Society of Chemistry journal article supplement (doi:10.1039/c8bm01337c), 2019-01-01
Supplement: c8bm01337c1.pdf [file c8bm01337c1.pdf]

# Chitosan Sulfate Inhibits Angiogenesis via Blocking VEGF/VEGFR2 Pathway and Suppress Tumor Growth *in Vivo*

Yingying Li <sup>1</sup>, Wei Wang <sup>\*1</sup>, Yapei Zhang <sup>1</sup>, Xinyu Wang <sup>1</sup>, Xuefeng Gao <sup>1</sup>, Zhi Yuan

<sup>\*1,2</sup>, and Yu Li <sup>1</sup>

<sup>1</sup> Key Laboratory of Functional Polymer Materials of Ministry of Education, Institute  
of Polymer Chemistry, College of Chemistry, Nankai University, Tianjin 300071,  
China

<sup>2</sup> Collaborative Innovation Center of Chemical Science and Engineering (Tianjin),  
Tianjin 300071, China

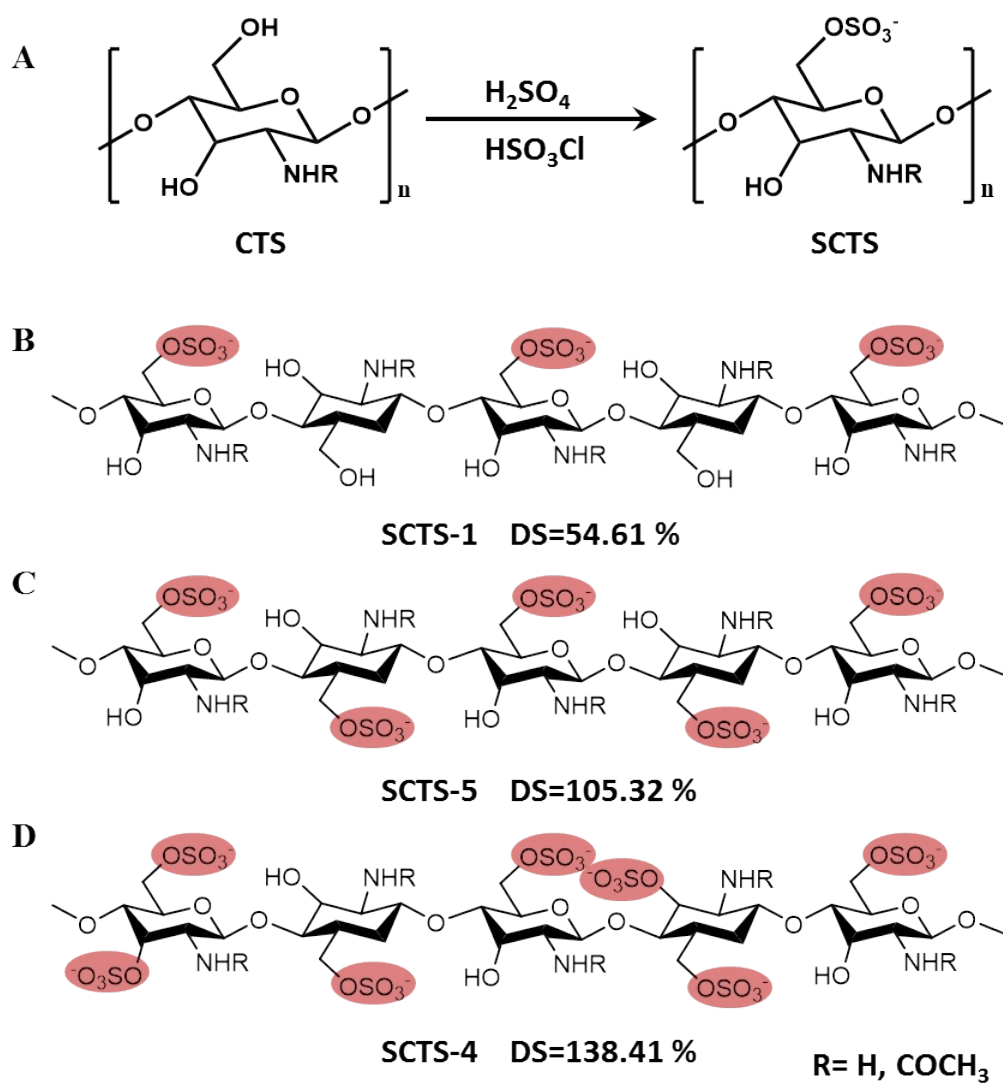

**Scheme S1.** (A) The synthetic route of SCTS. Structures of (B) SCTS-1 (DS= 54.61%), (C) SCTS-5 (DS= 105.32%), and (D) SCTS-4 (DS= 138.41%).

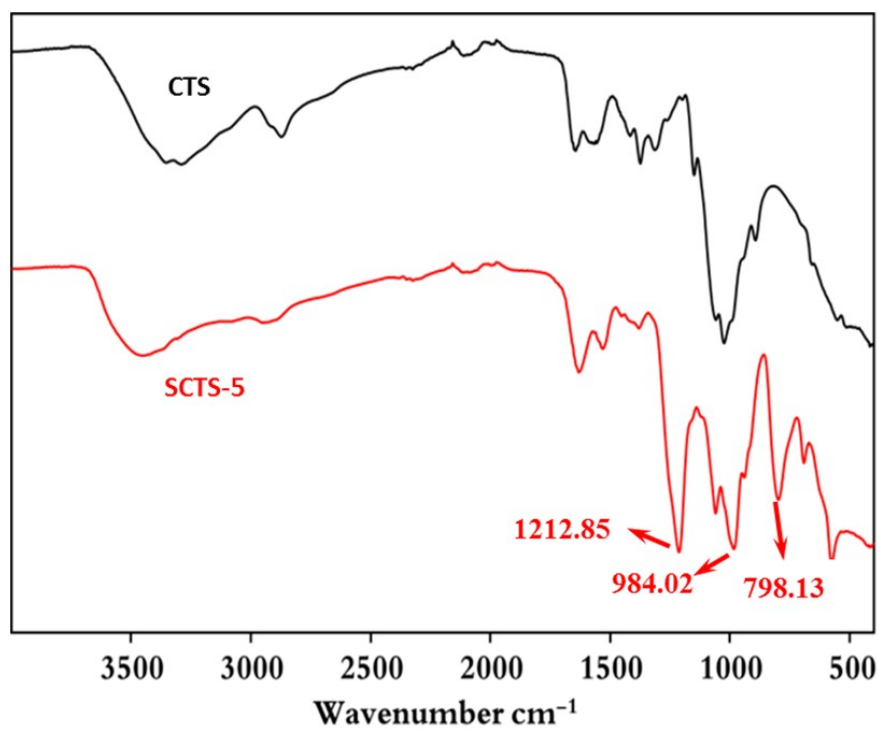

**Figure S1.** FTIR spectra of CTS and SCTS-5.

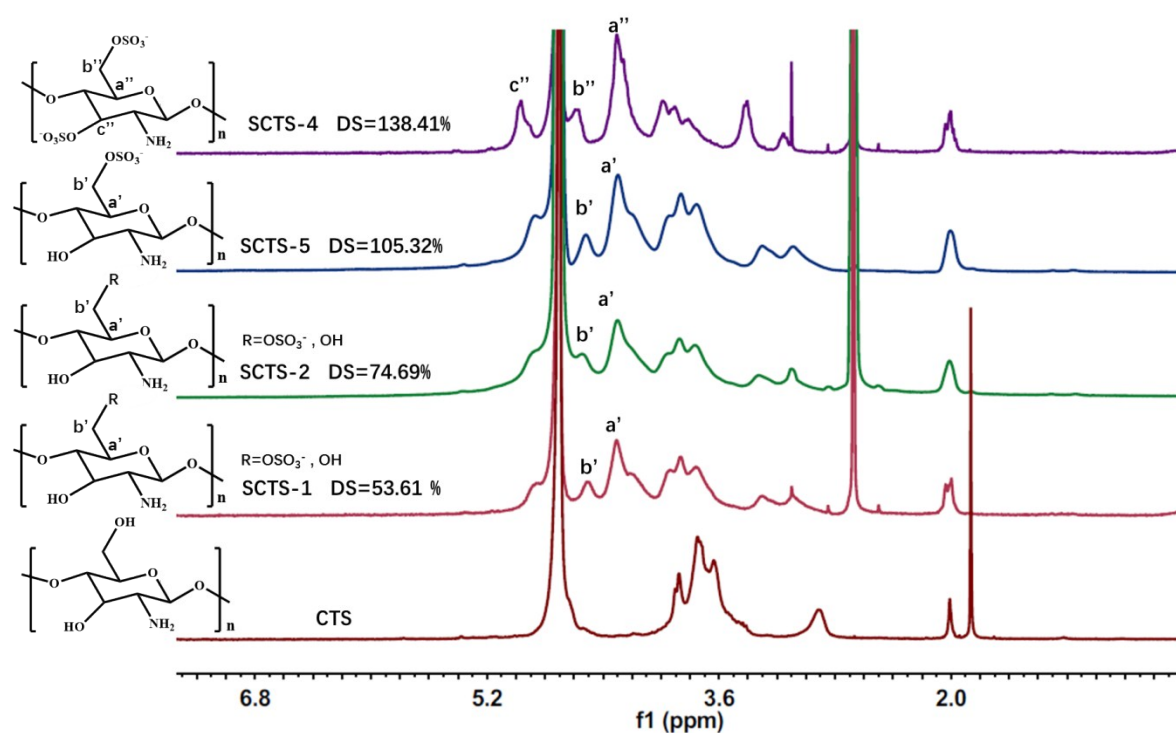

**Figure S2.**  $^1\text{H}$  NMR spectra of the CTS, SCTS-1, SCTS-2, SCTS-4 and SCTS-5.

**Table S1.** The molecular weight and the DS of SCTS prepared in different reaction conditions

| Sample | Sulfonated time (min) | DS (%) | Degradation time (min) | H <sub>2</sub> O <sub>2</sub> concentration (wt%) | M <sub>w</sub> (×10 <sup>4</sup> ) | PDI   |
|--------|-----------------------|--------|------------------------|---------------------------------------------------|------------------------------------|-------|
| SCTS-1 | 60                    | 53.61  | 180                    | 1.5                                               | 1.04                               | 1.173 |
| SCTS-2 | 180                   | 74.68  | 150                    | 1.5                                               | 1.01                               | 1.233 |
| SCTS-3 | 300                   | 98.71  | 90                     | 1.5                                               | 0.95                               | 1.326 |
| SCTS-4 | 420                   | 138.41 | 60                     | 1.5                                               | 0.93                               | 1.123 |
| SCTS-5 | 300                   | 105.32 | 150                    | 2.5                                               | 0.24                               | 1.271 |
| SCTS-6 | 300                   | 103.67 | 120                    | 2                                                 | 0.67                               | 1.097 |
| SCTS-7 | 300                   | 95.8   | 60                     | 1                                                 | 1.38                               | 1.215 |

DS defined as the number of –SO<sub>3</sub> - groups per 100 glucosamine units of chitosan.

The degradation of chitosan was performed at a temperature of 50°C.

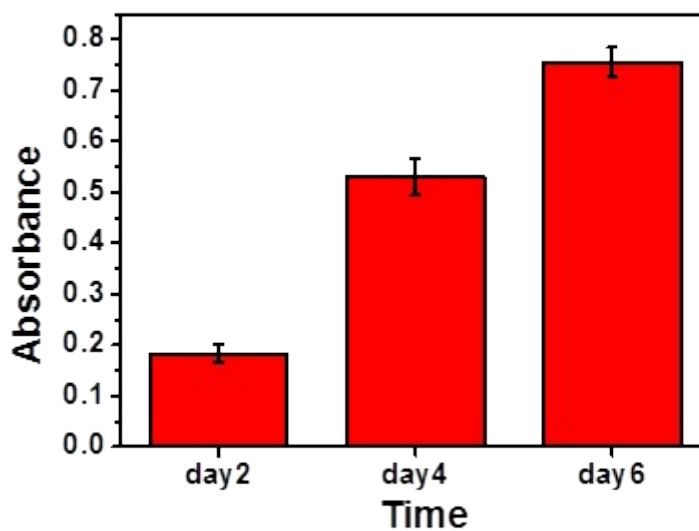

**Figure S3.** The absorbance of control group in the HUVEC proliferation test at 2, 4 and 6 days

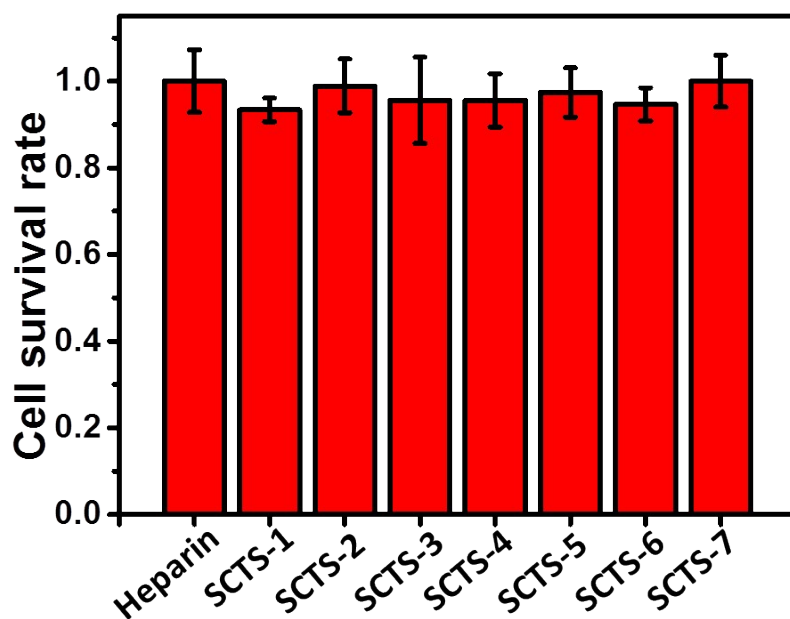

**Figure S4.** Cell survival rate of HUVEC after co-cultured with SCTS for 24 h

**Table S2.** Influence of SCTS-5 on the clotting time and bleeding time of mice in vivo

| sample  | clotting time (min) | bleeding time (min) |
|---------|---------------------|---------------------|
| control | 1.55±0.25           | 37.50±4.62          |
| SCTS-7  | 1.80±0.42           | 46.00±8.21          |
| Heparin | >10                 | >60                 |
